# Supplementary material
Source: PubMed Central journal article supplement (PMC8491061)
Supplement: kiab271_supplementary_data.pdf [file kiab271_supplementary_data.pdf]

## **Supplemental Materials**

### **Soil textures rather than root hairs dominate water uptake and soil-plant hydraulics under drought**

Gaochao Cai<sup>1,2</sup>, Andrea Carminati<sup>3</sup>, Mohanned Abdalla<sup>1</sup>, and Mutez Ali Ahmed<sup>1,2\*</sup>

<sup>1</sup>Chair of Soil Physics, Bayreuth Center of Ecology and Environmental Research (BayCEER), University of Bayreuth, Universitätsstraße 30, 95447, Bayreuth, Germany

<sup>2</sup>Biogeochemistry of Agroecosystems, University of Göttingen, Büsgenweg 2, 37077, Göttingen, Germany

<sup>3</sup>Physics of Soils and Terrestrial Ecosystems, Institute of Terrestrial Ecosystems, Department of Environmental Systems Science, ETH Zürich, Universitätstr. 16, 8092, Zurich, Switzerland

\*Corresponding author: Mutez Ali Ahmed

Email: Mutez.Ahmed@uni-bayreuth.de

# Supplemental Figures

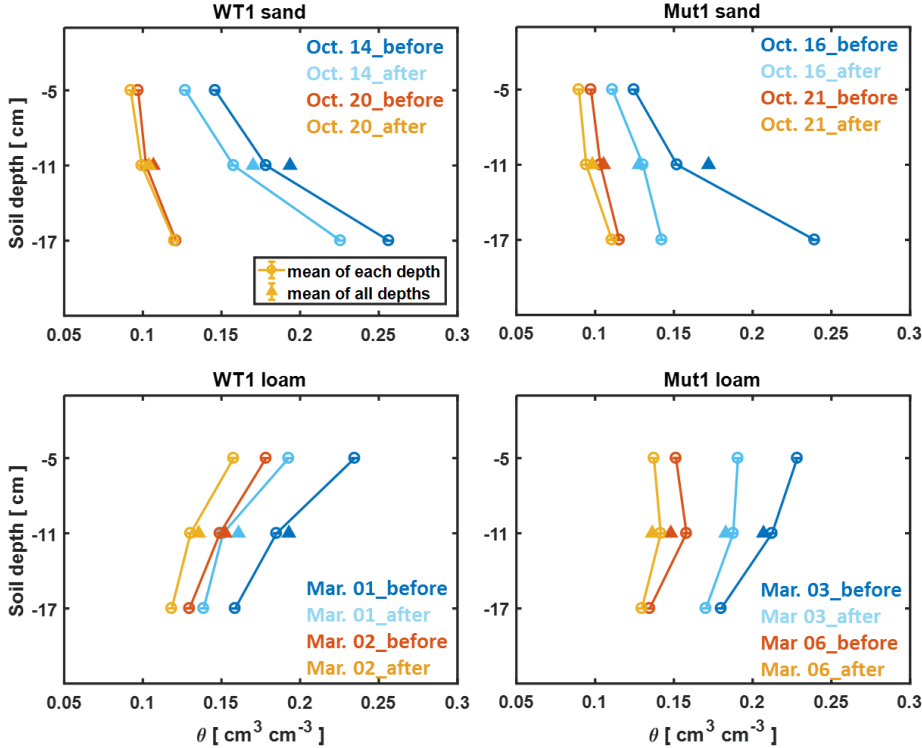

**Supplemental Figure S1.** Example of soil water content ( $\theta$ ) distribution at three locations along the soil column for a wild type (WT) and mutant (Mut) before and after the root pressure chamber measurements.  $n = 3$  at each depth.

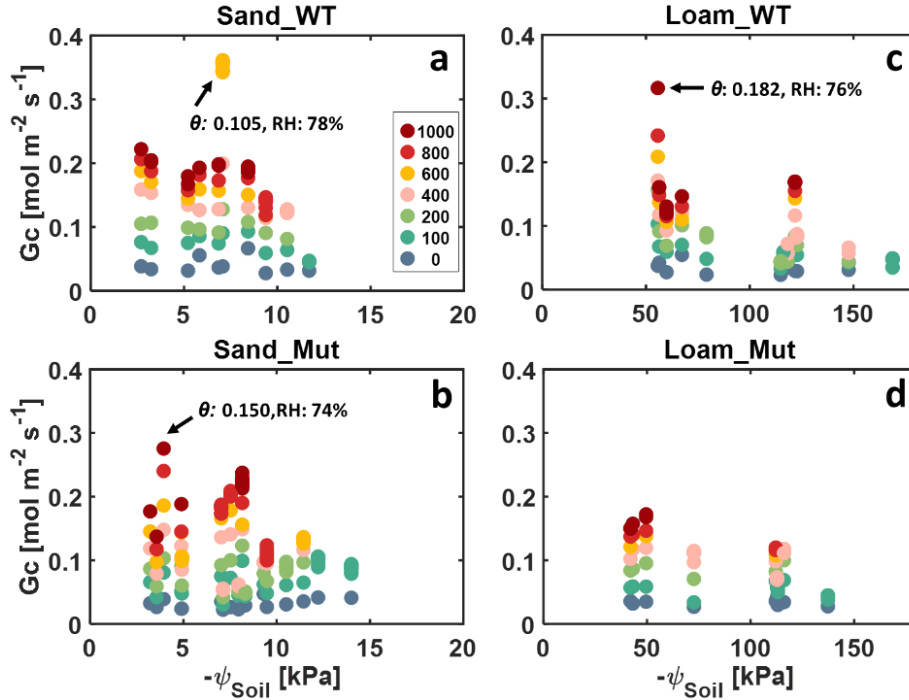

**Supplemental Figure S2.** Canopy stomatal conductance ( $G_c$ ) of wild-type (WT) and mutant (Mut) in sand and loam at different light intensities ( $\mu\text{mol m}^{-2} \text{s}^{-1}$ ) during soil drying. **(a-b)** sand and **(c-d)** loam. The legend in **(a)** is for the light intensity. Arrows showed exceptions with higher relative humidity (RH) of the outgoing air due to moist air in the laboratory, which results in a lower vapor pressure deficit ( $VPD$ ). More than two points of the same color at one soil matric potential ( $\psi_{\text{Soil}}$ ) mean that the applied pressure could not be sustained at that light intensity. Eliminating three exceptions with higher relative humidity (causing lower  $VPD$ ), effects of individual factors and interactions between different factors on canopy conductance were also similar to  $E_{\text{norm}}$  (Supplemental Table S2).

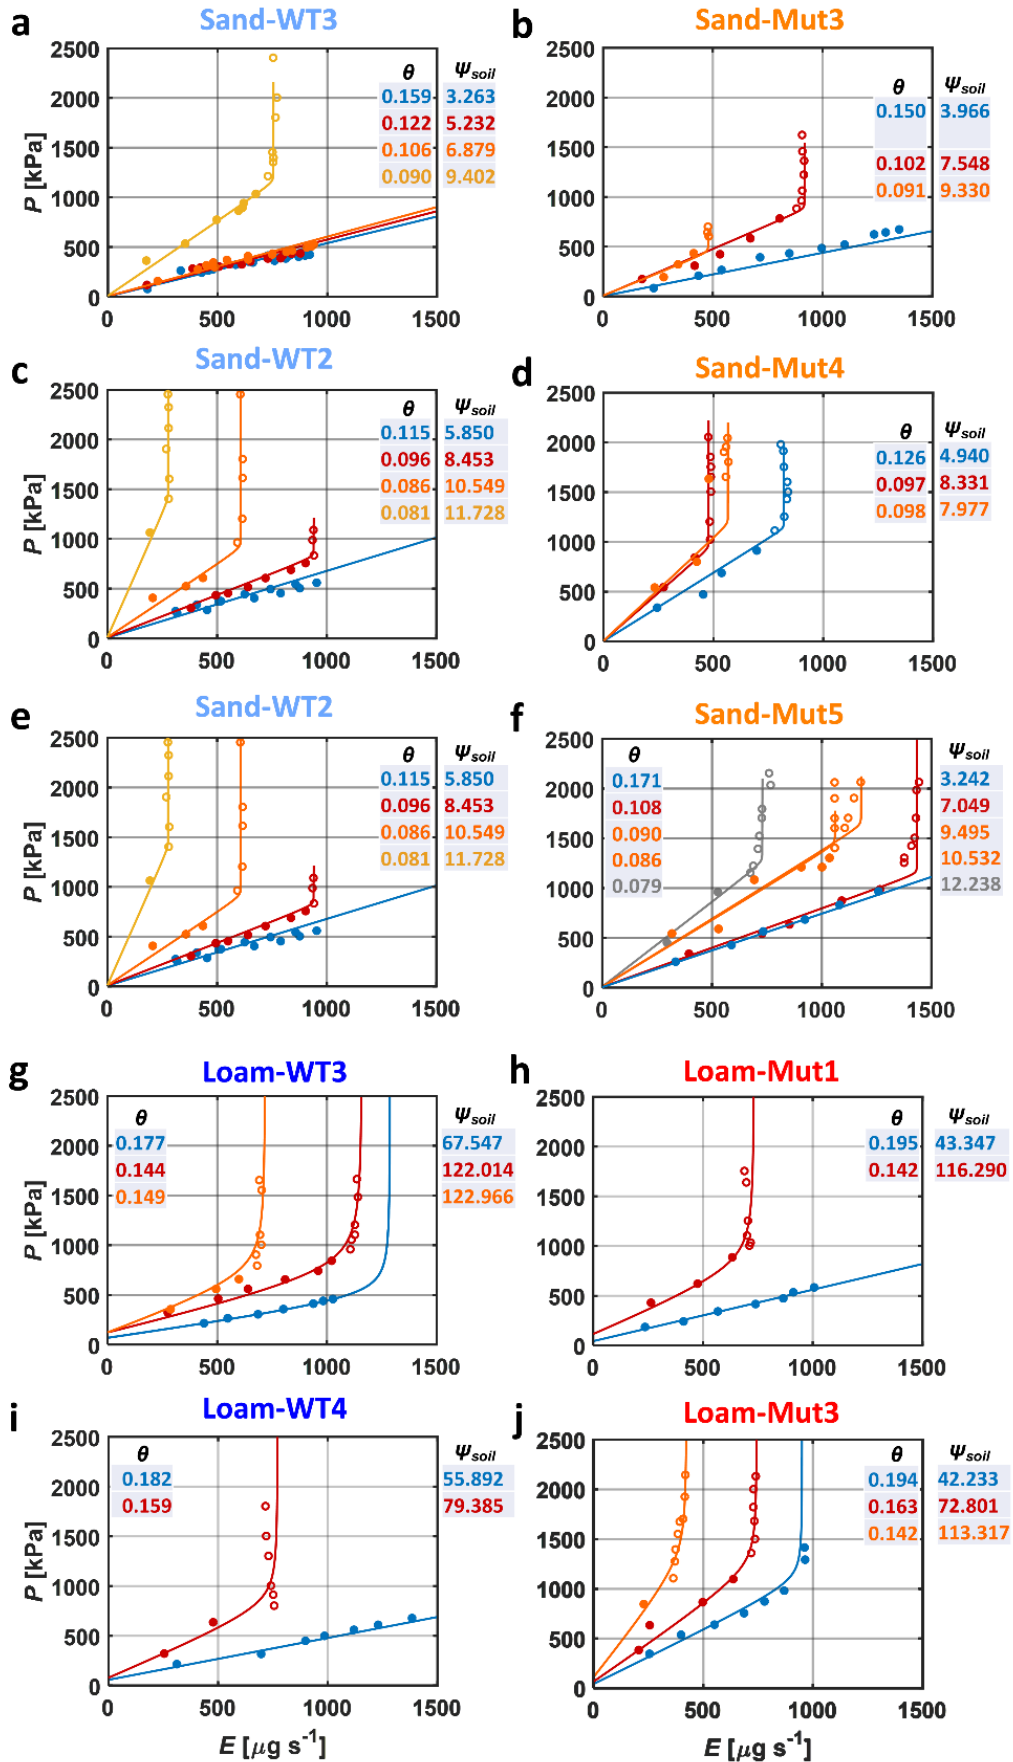

**Supplemental Figure S3.** Relation between balancing pressure ( $P$ ,  $-\psi_{leaf-x}$ ) and transpiration rate ( $E$ ) in wild-type (WT) and mutant (Mut) in sand and loam during soil drying. (a-f) sand. (g-j) loam. Close symbols are the measurements with steady-state balancing pressure whereas open symbols are recorded pressure when no steady-state could be reached. Same color was used for the curves and corresponding soil water content ( $\theta$ ,  $\text{cm}^3 \text{cm}^{-3}$ ) and soil matric potential ( $\psi_{Soil}$ , kPa) (values next to the curves).  $\psi_{Soil}$  was averaged from individual soil water content along the soil column. ‘Sand-WT2’ in (c and e) was the same plant as that in Fig. 5c. ‘Loam-Mut1’ in (h) was the same plant as that in Fig. 5f. Repeated usage of the same plants was to make a better comparison between genotypes.

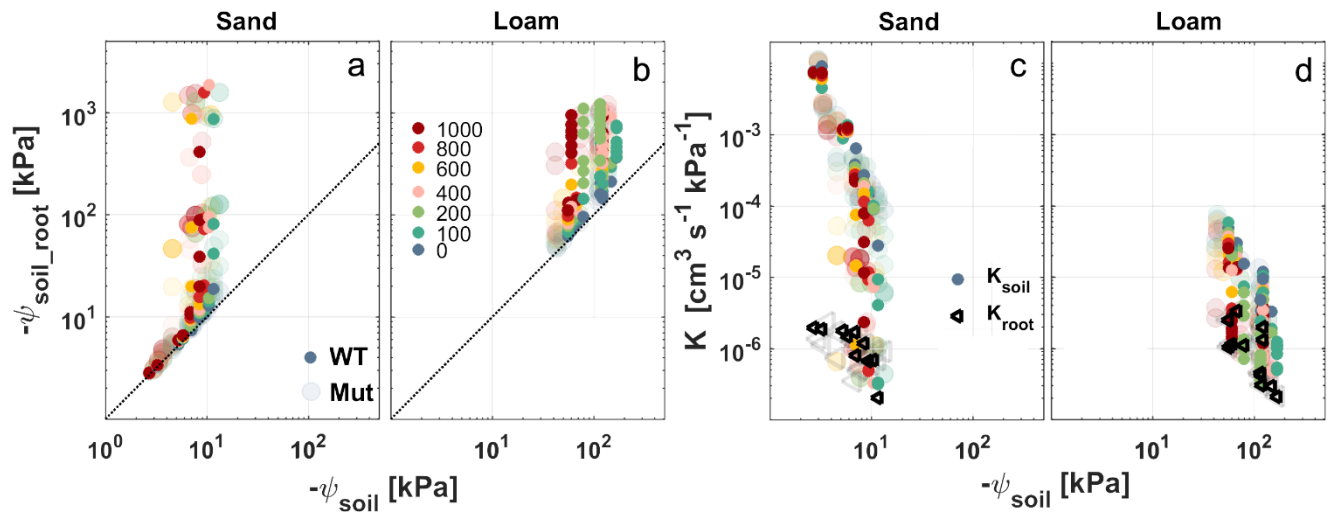

**Supplemental Figure S4.** Comparison between matric potential at the soil-root interface ( $\psi_{soil\_root}$ ) and in the bulk soil ( $\psi_{Soil}$ ) and comparison between soil conductance ( $K_{soil}$ ) and root hydraulic conductance ( $K_{root}$ ) for the wild-type (WT) and mutant (Mut) grown in sand and loam. Variations of matric potential and conductance with increasing transpiration rate were presented by the color of light intensity steps from blue-green to red (the legend in the second subplot,  $\mu\text{mol m}^{-2} \text{s}^{-1}$ ). Note that (a-b) were from Fig. 6 while (c-d) were from Fig. 7.

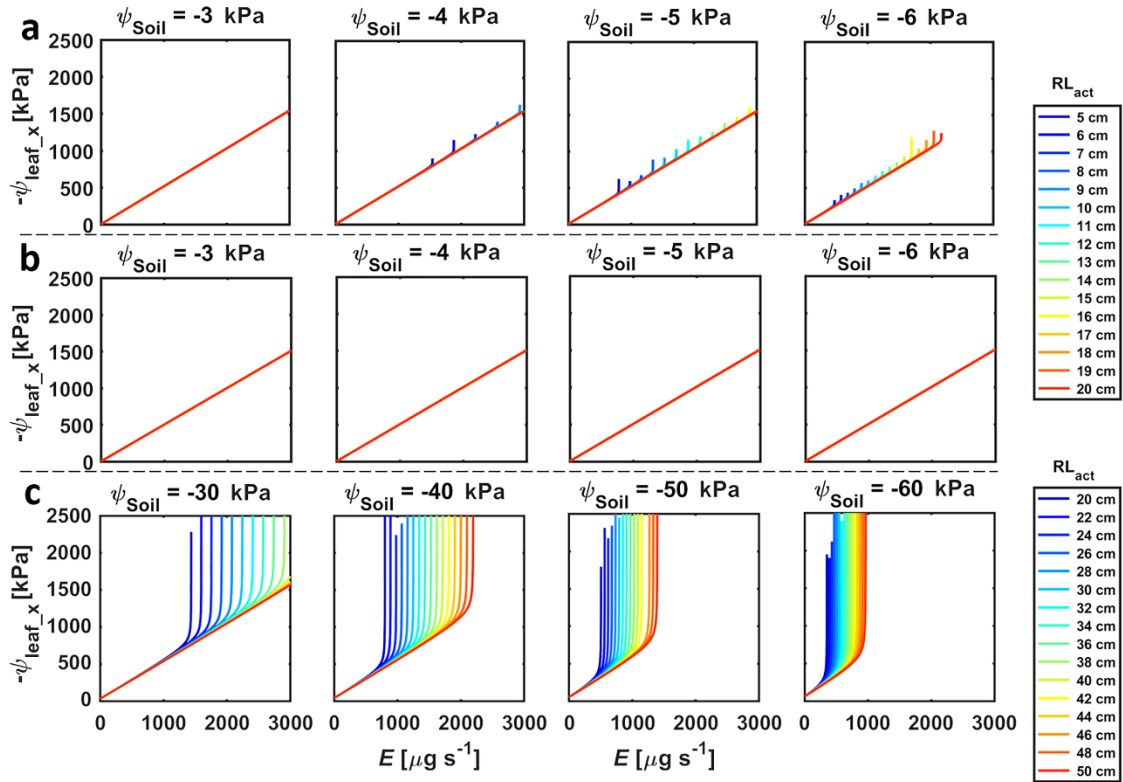

**Supplemental Figure S5.** Sensitivity analysis of active root length ( $RL_{act}$ ) on leaf xylem water potential ( $\psi_{leaf\_x}$ ) for different soil matric potentials ( $\psi_{Soil}$ ) in sand and loam. (a) sand. (b-c) loam. After curve bending, the less negative  $\psi_{leaf\_x}$  in sand than in loam was due to using the same resolution of  $E$  ( $1 \mu\text{g s}^{-1}$ ) for all simulations.

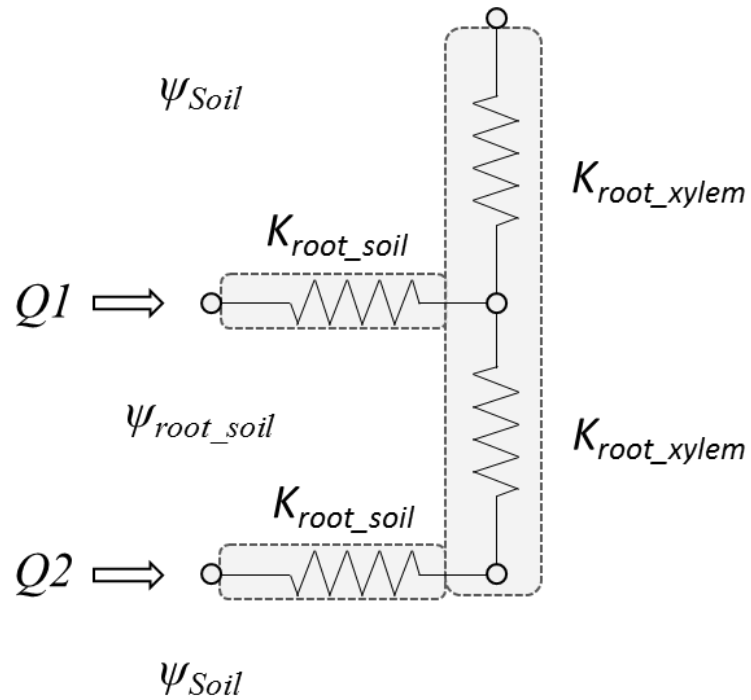

**Supplemental Figure S6.** Scheme of the simple root hydraulic architecture model of water uptake.  $K_{root\_xylem}$ : root xylem hydraulic conductance ( $\text{kPa cm}^{-3} \text{ s}$ ),  $K_{root\_soil}$ : hydraulic conductance at the soil-root interface ( $\text{kPa cm}^{-3} \text{ s}$ ),  $\psi_{Soil}$ : soil matric potential (kPa),  $\psi_{root\_soil}$ : matric potential at the soil-root interface (kPa),  $Q1$ : water uptake in the first layer ( $\text{cm}^3 \text{ s}^{-1}$ ),  $Q2$ : water uptake in the second layer ( $\text{cm}^3 \text{ s}^{-1}$ ).

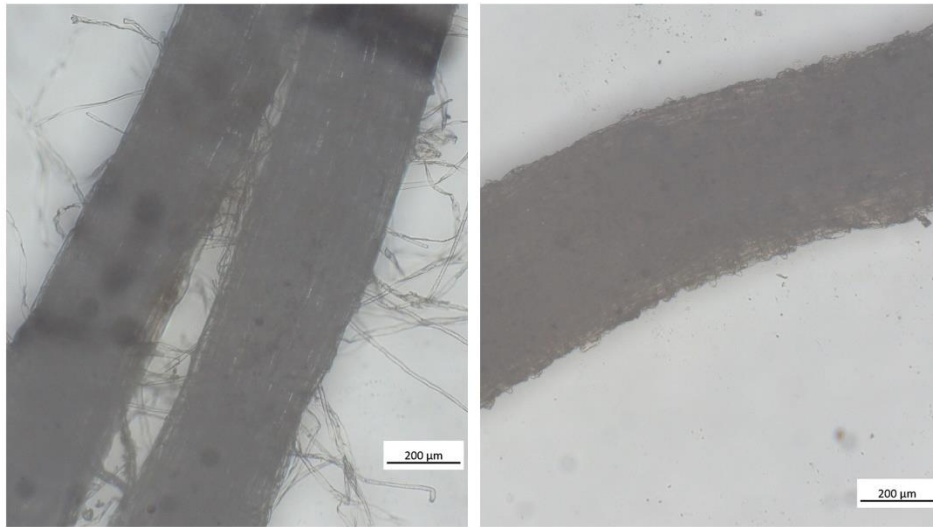

**Supplemental Figure S7.** Images of wild-type and mutant roots from plants grown in sand. Left: wild-type, right: mutant. The images were captured using a reflected light microscope (Axio Imager 2, Carl Zeiss) equipped with a digital camera (Axiocam 305, software Zen 2 cores, Carl Zeiss). Root samples were from lateral roots (ca. 5 cm above root tips) of the plants at 36 days after sowing when all measurements of transpiration rate and leaf xylem water potential were finished.



## Supplemental Tables

**Supplemental Table S1.** Analysis of variance (ANOVA) considering three-way interaction for the influence of different factors on normalized transpiration rate ( $E_{norm}$ ) shown in Figure 4.

| Source                                                                  | SS <sup>¶</sup> | DF  | MS       | F      | Prob>F    |
|-------------------------------------------------------------------------|-----------------|-----|----------|--------|-----------|
| Soil type                                                               | 2.57e-12        | 1   | 2.57e-12 | 14.84  | 0.0002*** |
| Genotype                                                                | 1.33e-14        | 1   | 1.33e-14 | 0.08   | 0.7826    |
| Soil matric potential <sup>¶¶</sup>                                     | 1.95e-13        | 2   | 9.75e-14 | 0.57   | 0.5692    |
| Light intensity                                                         | 1.53e-10        | 6   | 2.56e-11 | 146.74 | <0.001*** |
| Replicate (Soil type, Genotype, Soil matric potential, Light intensity) | 1.89e-11        | 104 | 1.82e-13 | 1.98   | 0.0014**  |
| Soil type * Genotype                                                    | 2.50e-15        | 1   | 2.50e-15 | 0.01   | 0.9045    |
| Soil type * Soil matric potential                                       | 5.06e-14        | 2   | 2.53e-14 | 0.15   | 0.8645    |
| Soil type * Light intensity                                             | 9.50e-13        | 6   | 1.58e-13 | 0.9    | 0.4973    |
| Genotype * Soil matric potential                                        | 2.13e-14        | 2   | 1.06e-14 | 0.06   | 0.9409    |
| Genotype * Light intensity                                              | 4.87e-13        | 6   | 8.12e-14 | 0.46   | 0.8385    |
| Soil matric potential * Light intensity                                 | 1.54e-12        | 12  | 1.29e-13 | 0.73   | 0.7152    |
| Soil type * Genotype * Soil matric potential                            | 3.31e-15        | 2   | 1.66e-15 | 0.01   | 0.9907    |
| Soil type * Genotype * Light intensity                                  | 9.71e-13        | 6   | 1.62e-13 | 0.93   | 0.4783    |
| Genotype * Soil matric potential * Light intensity                      | 1.45e-12        | 12  | 1.21e-13 | 0.68   | 0.7689    |
| Soil type * Soil matric potential * Light intensity                     | 2.85e-12        | 12  | 2.37e-13 | 1.35   | 0.2001    |
| Error                                                                   | 6.34e-12        | 69  | 9.18e-14 |        |           |
| Total                                                                   | 2.60e-10        | 244 |          |        |           |

<sup>¶</sup>SS: sum of squares, DF: degree of freedom, MS: mean sum of squares, F: F-statistic value.  $p < 0.001$ \*\*\*,  $p < 0.01$ \*\* ,  $p < 0.05$ \*.

<sup>¶¶</sup> Soil matric potential in both soils was normalized to be in the range of 0 and 1. Group 1, 2, and 3 for each genotype was from 0 to 0.2 (wet soil), 0.2 to 0.6 (moderate dry), and 0.6 to 1 (dry) where all the  $P(E)$  curves were linear (bent at high water content), either linear or nonlinear, and nonlinear, respectively. This ensures at least two  $P(E)$  measurements in each group from each genotype and soil type.

**Supplemental Table S2.** Analysis of variance (ANOVA) considering three-way interaction for the influence of different factors on canopy stomatal conductance ( $G_c$ ) shown in Supplemental Figure S2.

| Source                                                                  | SS <sup>¶</sup> | DF  | MS       | F     | Prob>F    |
|-------------------------------------------------------------------------|-----------------|-----|----------|-------|-----------|
| Soil type                                                               | 1.49e-02        | 1   | 1.49e-02 | 24.35 | <0.001*** |
| Genotype                                                                | 1.73e-03        | 1   | 1.73e-03 | 2.84  | 0.0950    |
| Soil matric potential <sup>¶¶</sup>                                     | 2.80e-04        | 2   | 1.40e-04 | 0.23  | 0.7929    |
| Light intensity                                                         | 3.31e-01        | 6   | 5.52e-02 | 90.13 | <0.001*** |
| Replicate (Soil type, Genotype, Soil matric potential, Light intensity) | 6.40e-02        | 98  | 6.50e-04 | 2.96  | <0.001*** |
| Soil type * Genotype                                                    | 1.46e-03        | 1   | 1.46e-03 | 2.4   | 0.1245    |
| Soil type * Soil matric potential                                       | 6.10e-04        | 2   | 3.00e-04 | 0.5   | 0.6088    |
| Soil type * Light intensity                                             | 4.68e-03        | 6   | 7.80e-04 | 1.25  | 0.2850    |
| Genotype * Soil matric potential                                        | 7.70e-04        | 2   | 3.80e-04 | 0.63  | 0.5361    |
| Genotype * Light intensity                                              | 1.40e-04        | 6   | 2.00e-05 | 0.04  | 0.9998    |
| Soil matric potential * Light intensity                                 | 3.91e-03        | 12  | 3.30e-04 | 0.53  | 0.8913    |
| Soil type * Genotype * Soil matric potential                            | 6.00e-05        | 2   | 3.00e-05 | 0.05  | 0.9546    |
| Soil type * Genotype * Light intensity                                  | 2.73e-03        | 6   | 4.50e-04 | 0.74  | 0.6193    |
| Genotype * Soil matric potential * Light intensity                      | 3.73e-03        | 12  | 3.10e-04 | 0.49  | 0.9145    |
| Soil type * Soil matric potential * Light intensity                     | 1.01e-02        | 12  | 8.40e-04 | 1.35  | 0.2009    |
| Error                                                                   | 1.48e-02        | 67  | 2.20e-04 |       |           |
| Total                                                                   | 6.52e-01        | 236 |          |       |           |

<sup>¶</sup>SS: sum of squares, DF: degree of freedom, MS: mean sum of squares, F: F-statistic value.  $p < 0.001$ \*\*\*,  $p < 0.01$ \*\* ,  $p < 0.05$ \*.

<sup>¶¶</sup> Soil matric potential in both soils was normalized to be in the range of 0 and 1. Group 1, 2, and 3 for each genotype was from 0 to 0.2 (wet soil), 0.2 to 0.6 (moderate dry), and 0.6 to 1 (dry) where all the  $P(E)$  curves were linear (bent at high water content), either linear or nonlinear, and nonlinear, respectively. This ensures at least two  $P(E)$  measurements in each group from each genotype and soil type. Exceptions with high relative humidity in Supplemental Figure S2 were not considered in this analysis.

**Supplemental Table S3.** Analysis of covariance (ANCOVA) for the regression slopes of relation between soil ( $\psi_{Soil}$ ) and root hydraulic ( $K_{root}$  and  $RL_{act}$ ) parameters for genotypes and soil types shown in Figure 7.

| Parameters (in subplot of Fig. 7)                             | Soil type ( $p$ ) | Genotype ( $p$ ) | $\psi_{Soil}$ or $K_s$ ( $p$ ) | Interaction between Soil/Geno- types and $\psi_{Soil}$ or $K_s$ ( $p$ ) |
|---------------------------------------------------------------|-------------------|------------------|--------------------------------|-------------------------------------------------------------------------|
| $\psi_{soil}$ vs $K_{root}$ of WT and Mut in Sand (a)         | -                 | 0.9695           | 0.0011**                       | 0.1202                                                                  |
| $\psi_{soil}$ vs $K_{root}$ of WT and Mut in Loam (a)         | -                 | 0.2838           | 0.001***                       | 0.2176                                                                  |
| $\psi_{soil}$ vs $K_{root}$ in sand and loam (a)              | < 0.001***        | -                | < 0.001***                     | 0.2891                                                                  |
| $\psi_{soil}$ vs $RL_{act}$ of WT and Mut in Sand (b)         | -                 | 0.3082           | < 0.001***                     | 0.0960                                                                  |
| $\psi_{soil}$ vs $RL_{act}$ of WT and Mut in Loam (b)         | -                 | 0.6845           | < 0.001***                     | 0.2220                                                                  |
| $\psi_{soil}$ vs $RL_{act}$ in sand and loam (b)              | 0.0115*           | -                | < 0.001***                     | 0.6411                                                                  |
| $\psi_{soil}$ vs $RL_{act} / RL_{total}$ in sand and loam (c) | 0.6661            | -                | 0.0008***                      | 0.9656                                                                  |

$p < 0.001$ \*\*\*,  $p < 0.01$ \*\* ,  $p < 0.05$ \*.

**Supplemental Table S4.** Fertilizer applied to the sandy and loamy soils.

| Soil | Nutrient | Application rate (mg kg <sup>-1</sup> soil) | Type                                                  |
|------|----------|---------------------------------------------|-------------------------------------------------------|
| Sand | N        | 20                                          | NH <sub>4</sub> NO <sub>3</sub>                       |
|      | P        | 80                                          | CaHPO <sub>4</sub>                                    |
|      | K        | 20                                          | K <sub>2</sub> SO <sub>4</sub>                        |
|      | Mg       | 10                                          | MgCl <sub>2</sub> × 6H <sub>2</sub> O                 |
|      | Ca       | 100                                         | CaSO <sub>4</sub> × 2H <sub>2</sub> O                 |
|      | Mn       | 0.65                                        | MnSO <sub>4</sub> × H <sub>2</sub> O                  |
|      | Zn       | 0.16                                        | Zn(NO <sub>3</sub> ) <sub>2</sub> × 4H <sub>2</sub> O |
|      | Cu       | 0.10                                        | CuSO <sub>4</sub> × 5H <sub>2</sub> O                 |
|      | B        | 0.03                                        | H <sub>3</sub> BO <sub>3</sub>                        |
|      | Fe       | 0.65                                        | Fe-EDTA                                               |
| Loam | N        | 10                                          | NH <sub>4</sub> NO <sub>3</sub>                       |
|      | P        | 40                                          | CaHPO <sub>4</sub>                                    |
|      | K        | 10                                          | K <sub>2</sub> SO <sub>4</sub>                        |
|      | Mg       | 5                                           | MgCl <sub>2</sub> × 6H <sub>2</sub> O                 |

## Supplemental Method S1: extended description of the soil-plant hydraulic model

The water flow from soil into roots is described by the Richards equation:

$$\frac{\partial \theta}{\partial t} = \frac{1}{r} \frac{\partial}{\partial r} \left( r k_s(h) \frac{\partial h}{\partial r} \right) \quad (\text{Eq. S1})$$

where  $\theta$  is the volumetric water content ( $\text{cm}^3 \text{cm}^{-3}$ ),  $t$  is time (s),  $r$  is the radial coordinate (cm),  $k_s$  is the soil hydraulic conductivity ( $\text{cm s}^{-1}$ ), and  $h$  is the water matric head (cm), which is the quotient of soil matric potential by the product of gravity  $g$  and water density  $\rho$  ( $h = \psi_{\text{soil}}/\rho g$ ).

We assumed a steady-rate behavior for the water flow in soil. Eq. S1 can be linearized to matric flux potential ( $\Phi$ ,  $\text{cm}^2 \text{s}^{-1}$ ) as the integral of hydraulic conductivity ( $k$ ) over matric head using the Kirchhoff transformation approach (de Jong van Lier et al., 2008):

$$\Phi(\psi) = \int_{-\infty}^{\psi} k(x) dx \quad (\text{Eq. S2})$$

The flux boundary condition at the soil-root interface was obtained by combining the radial Richards equation S1, S2 and Eq. 2 (Schröder et al., 2009):

$$\Phi_{\text{soil\_root}} = -\frac{E}{2\pi RL_{\text{act}}} \left( \frac{1}{2} - r_b^2 \frac{\ln(r_b/r_0)}{r_b^2 - r_0^2} \right) + \Phi_{\text{soil}} \quad (\text{Eq. S3})$$

where  $\Phi_{\text{soil\_root}}$  and  $\Phi_{\text{soil}}$  are the matric flux potentials ( $\text{cm}^2 \text{s}^{-1}$ ) at the soil-root interface and the bulk soil, respectively.  $E$  is the transpiration rate ( $\text{cm}^3 \text{s}^{-1}$ ).  $RL_{\text{act}}$  is the active root length (cm), and  $r_0$  and  $r_b$  are root and rhizosphere radius (cm), respectively.  $\Phi_{\text{soil}}$  can be calculated using Eq. S2 and 3. Consequently, the matric potential at the soil-root interface  $\psi_{\text{soil\_root}}$  can be obtained based on Eq. S2, S3, and 3:

$$\psi_{\text{soil\_root}} = \left( \frac{\frac{\psi_0^\tau \psi_{\text{soil}}^{1-\tau} k_{\text{sat}}}{\tau-1} - \Phi_{\text{soil}}}{\frac{\psi_0^\tau k_{\text{sat}}}{\tau-1}} \right)^{\frac{1}{1-\tau}} \quad (\text{Eq. S4})$$

where  $\psi_0$  and  $\tau$  are parameters in the Brooks and Corey model described in Eq. 3, and  $k_{\text{sat}}$  is the saturated soil hydraulic conductivity ( $\text{cm s}^{-1}$ ) in Eq. 3.

The water flow in the xylem is described by:

$$E = K_x(\psi_{\text{xylem\_root}} - \psi_{\text{leaf\_x}}) \quad (\text{Eq. S5})$$

where  $K_x$  is the aboveground xylem conductance ( $\text{cm}^3 \text{kPa}^{-1} \text{s}^{-1}$ ), and is derived from the root hydraulic conductance ( $K_{root}$ ):

$$K_x(\psi) = K_{root} \left( \frac{\psi_{soil}}{\psi_{xylem_0}} \right)^{-\tau_x} \quad (\text{Eq. S6})$$

where  $\psi_{xylem_0}$  is the matric potential when the xylem cavitates (kPa). In this study, we pressurized the plants and xylem cavitation is excluded. A value negative than 1500 kPa was used in the model, i.e., -3000 kPa.  $\tau_x$  is a constant (-), and 5 is used in this study. Therefore,  $K_x \gg K_{root}$ .

The hydraulic conductance of a whole plant ( $K_{plant}$ ) is composed of  $K_x$  and  $K_{root}$ :

$$\frac{1}{K_{plant}} = \frac{1}{K_{root}} + \frac{1}{K_x} \quad (\text{Eq. S7})$$

$K_{plant}$  is approximately equal to  $K_{root}$  in this study when combing Eq. S6 and Eq. S7.

Flux matric potential could also be used to link the flow between leaf and xylem according to Eq S2:

$$\Phi_{leaf\_x} = -E + \Phi_{xylem\_root} \quad (\text{Eq. S8})$$

from which  $\psi_{leaf\_x}$  can be derived when combing Eq. S4, S5, S6, and 5.

$$\psi_{leaf\_x} = \left( \psi_{xylem\_root}^{1-\tau_x} - \frac{E(\tau_x-1)}{\psi_{xylem_0}^{\tau_x} K_{root}} \right)^{\frac{1}{1-\tau_x}} \quad (\text{Eq. S9})$$

**Supplemental references:**

**de Jong van Lier Q, van Dam JC, Metselaar K, de Jong R, Duijnisveld WHM (2008)** Macroscopic Root Water Uptake Distribution Using a Matric Flux Potential Approach. *Vadose Zone Journal* **7**: 1065

**Schröder T, Javaux M, Vanderborcht J, Körfgen B, Vereecken H (2009)** Implementation of a Microscopic Soil–Root Hydraulic Conductivity Drop Function in a Three-Dimensional Soil–Root Architecture Water Transfer Model. All rights reserved. *Vadose Zone Journal* **8**: 783–792
